# Supplementary material
Source: PubMed Central journal article supplement (PMC8846494)
Supplement: aac.01636-21-s0001.pdf [file aac.01636-21-s0001.pdf]

## SUPPLEMENTARY MATERIAL

Pharmacodynamics and the Bactericidal Activity of Bedaquiline in Pulmonary Tuberculosis

Michael A. Lyons

Mycobacteria Research Laboratories

Department of Microbiology, Immunology and Pathology

Colorado State University, Fort Collins, Colorado, USA

michael.lyons@colostate.edu

- Structural and statistical model diagrams
- Bedaquiline PK model parameters: prior point value estimates
- PK-PD model parameters: prior distributions
- PK-PD model: goodness-of-fit plots and statistics

## Structural and statistical model diagrams

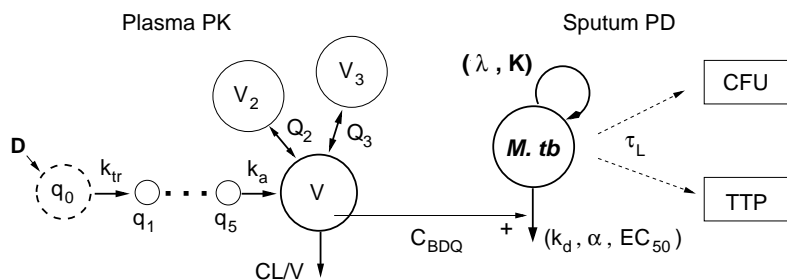

Figure S1: Bedaquiline pharmacokinetic-pharmacodynamic (PK-PD) structural model.  $D$ , dose;  $q_0$ , drug mass depot,  $q_1, \dots, q_5$ , drug mass transit compartments;  $V$ , central volume of distribution,  $V_2, V_3$ , peripheral volumes of distribution;  $CL$ , systemic clearance;  $Q_2, Q_3$ , intercompartmental clearances;  $\lambda$ , sputum *M. tuberculosis* accumulation rate constant;  $K$ , sputum *M. tuberculosis* carrying capacity;  $k_d$ , drug kill rate constant;  $\alpha$ , drug kill delay constant;  $EC_{50}$ , half-maximum effect drug concentration;  $\tau_L$ , liquid culture time constant; CFU, sputum solid culture CFU; TTP and liquid culture time to positivity. The PK and PD models are linked by the BDQ plasma concentration,  $C_{BDQ}$ .

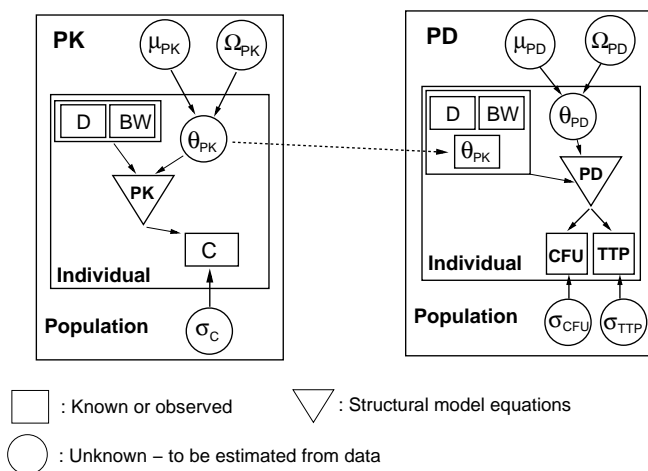

Figure S2: Graphical representation of the hierarchical statistical model. Population and individual levels for the pharmacokinetic (PK) and pharmacodynamic (PD) model components.  $\mu$ : population mean;  $\Omega$ : population variance;  $\sigma$  residual error;  $D$ : dose;  $BW$ : body weight;  $\theta$ : unmeasured model parameters;  $C$ : observed drug concentrations; CFU and TTP: observed CFU and TTP. Arrows denote dependencies.

## Bedaquiline PK model parameters: prior point value estimates

Bedaquiline concentration-time profile after a single 400 mg dose from:

Dooley, K. E., J. G. Park, S. Swindells, R. Allen, D. W. Haas, Y. Cramer, F. Aweeka, 399 I. Wiggins, A. Gupta, P. Lizak, S. Qasba, R. van Heeswijk, C. Flexner, D. Sutherland, M. Free, M. Chicurel, C. W. Tedder, S. L. Koletar, H. Harber, A. Luetkemeyer, J. Dwyer, J. Hackman, and A. Weiss. 2012. Safety, tolerability, and pharmacokinetic interactions of the antituberculous agent TMC207 (bedaquiline) with efavirenz in healthy volunteers: AIDS Clinical Trials Group Study A5267. *J Acquir Immune Defic Syndr* 59:455462.

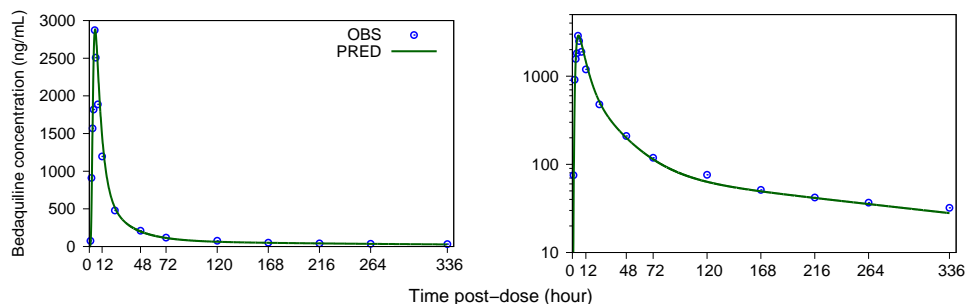

Figure S3: Mean concentrations of bedaquiline in plasma versus time after a single 400 mg oral dose. OBS, observed data; PRED, model-predicted curve generated from the structural model using the point values shown in Table S1.

Table S1: PK model parameters. Point value estimates obtained from a sum of exponentials curve fit to the bedaquiline mean concentration-time profile.

| Parameter | Value (units)        | Description                                     |
|-----------|----------------------|-------------------------------------------------|
| $D$       | 400 mg               | Dose                                            |
| $F_{max}$ | 1                    | Maximum bioavailability                         |
| $BW$      | 70 kg                | Body weight (standard value)                    |
| $k_{tr}$  | $2.4 \text{ h}^{-1}$ | Transit compartment mass transfer rate constant |
| $k_a$     | $0.9 \text{ h}^{-1}$ | Oral absorption rate constant                   |
| $V$       | 90 L                 | Central compartment volume of distribution      |
| $V_2$     | 60 L                 | Peripheral compartment volume of distribution   |
| $V_3$     | 650 L                | Peripheral compartment volume of distribution   |
| $Q_2$     | 4 L/h                | Intercompartmental clearance                    |
| $Q_3$     | 3.4 L/h              | Intercompartmental clearance                    |
| $CL$      | 6.2 L/h              | Systemic clearance                              |

The observed data points were extracted from the published plot using g3data (version 1.5.2 [<http://github.com/pn2200/g3data>]). The curve fit was obtained using the R statistical software (version 3.3.3; R Development Team, [<https://www.R-project.org>]), and the PK (version 1.3.5 [<https://CRAN.R-project.org/package=PK>]) and PKconverter (version 1.5 [<https://CRAN.R-project.org/package=PKconverter>]) packages.

## PK-PD model parameters: prior distributions.

Table S2: Prior population mean and interindividual variability distributions.

| Parameter (units)                | $\exp(\mu)$     |                                  | $\omega^2$     |
|----------------------------------|-----------------|----------------------------------|----------------|
| <u>PK parameters<sup>a</sup></u> |                 |                                  |                |
| $k_{tr}$ (1/h)                   | LN(0.88, 0.04)  | [0.2, 20]                        | HN(0.11)       |
| $k_a$ (1/h)                      | LN(0, 0.04)     | [0.1, 10]                        | HN(0.11)       |
| $V_c$ (L)                        | LN(4.50, 0.04)  | [10, 1000]                       | HN(0.11)       |
| $V_{2c}$ (L)                     | LN(4.09, 0.04)  | [10, 600]                        | HN(0.11)       |
| $V_{3c}$ (L)                     | LN(6.48, 0.04)  | [60, 6000]                       | HN(0.11)       |
| $Q_{2c}$ (L/h)                   | LN(1.39, 0.04)  | [1, 40]                          | HN(0.11)       |
| $Q_{3c}$ (L/h)                   | LN(1.10, 0.04)  | [1, 30]                          | HN(0.11)       |
| $CL_c$ (L/h)                     | LN(1.79, 0.01)  | [2, 30]                          | HN(0.11)       |
| <u>PD parameters</u>             |                 |                                  |                |
| $N_0$ (CFU/mL)                   | LN(13.98, 0.35) | $[1 \times 10^3, 1 \times 10^9]$ | HN(6.0)        |
| $T_0$ (h)                        | LN(4.60, 0.01)  | [24, 400]                        | HN(0.1)        |
| $\tau_L$ (h)                     | LN(3.0, 0.01)   | [10, 40]                         | HN(0.1)        |
| $\lambda$ (1/h)                  | LN(-6.91, 0.15) | [0.0003, 0.003]                  | - <sup>a</sup> |
| $K$ (CFU/mL)                     | LN(18.4, 0.6)   | $[1 \times 10^7, 1 \times 10^9]$ | - <sup>a</sup> |
| $k_d$ (1/h)                      | LN(-4.02, 0.01) | [0.004, 0.09]                    | HN(0.2)        |
| $\alpha$ (1/h)                   | LN(-3.91, 0.01) | [0.004, 0.1]                     | HN(0.2)        |
| $EC_{50}$ (mg/L)                 | LN(0.34, 0.01)  | [0.3, 8]                         | HN(0.2)        |
| $H$                              | LN(0, 0.01)     | [0.1, 10]                        | HN(0.1)        |

LN: lognormal distribution,  $\text{LN}(M_\mu, S_\mu^2)$ [truncation bounds], with geometric mean =  $\exp(M_\mu)$ , and geometric standard deviation =  $\exp(S_\mu)$ .  
 HN: Half-normal distribution,  $\text{HN}(\text{SD})$ , with  $\text{SD} = \omega^2 \cdot \sqrt{\pi/2}$ , where  $\omega^2 = \log(\text{CV}^2 + 1)$ , and CV the coefficient of variation.

<sup>a</sup> Parameter uncertainty and interindividual variability were combined.

## PK-PD model: goodness-of-fit plots and statistics

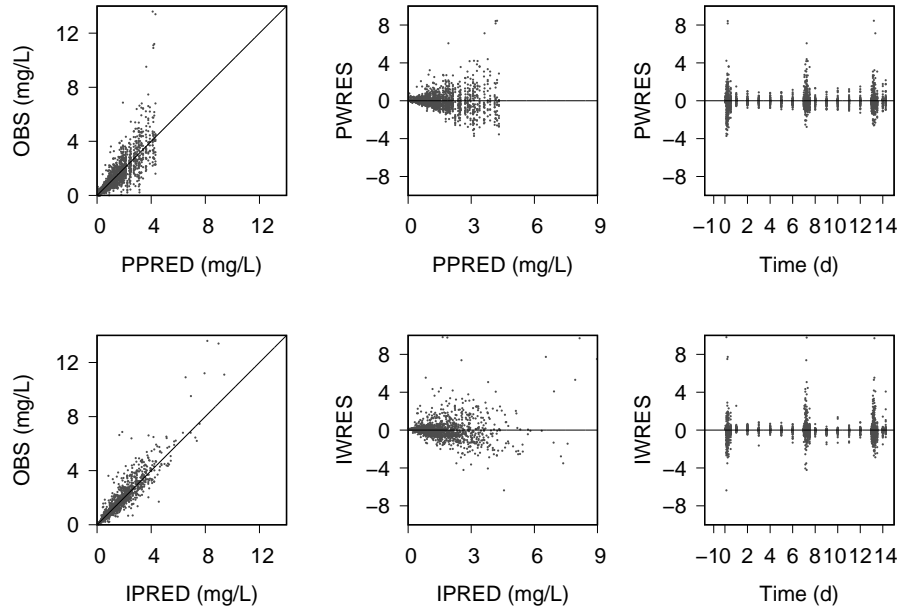

Figure S4: Goodness-of-fit plots for model-predicted and observed bedaquiline concentrations. The plots are: observed individual data (OBS) versus population predicted mean (PPRED) and individual predicted (IPRED) values, with the diagonal lines representing perfect fit; and the weighted residuals of the population mean (PWRES) and individual (IWRES) versus the corresponding predictions and time. The horizontal lines represent zero residual error.

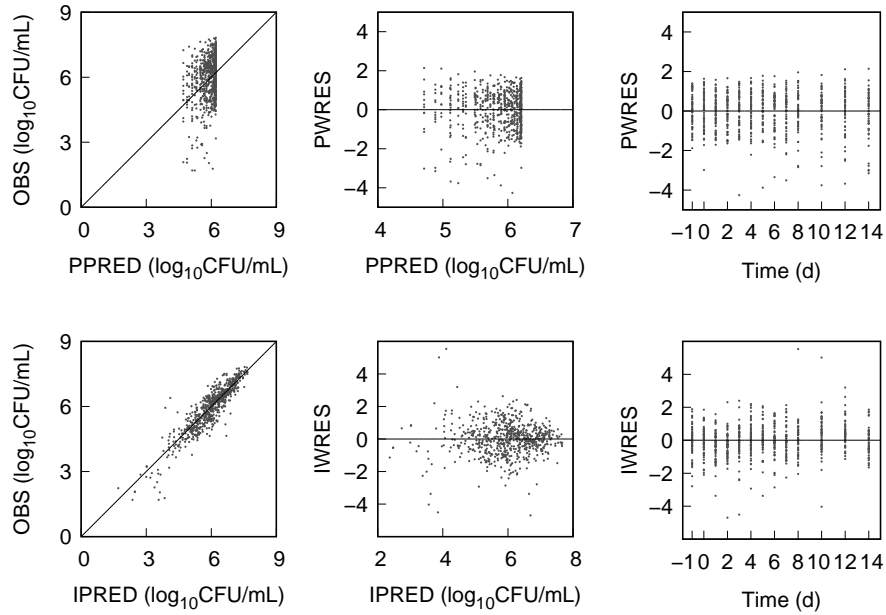

Figure S5: Goodness-of-fit plots for model-predicted and observed CFU data. The plots are: observed individual data (OBS) versus population predicted mean (PPRED) and individual predicted (IPRED) values, with the diagonal lines representing perfect fit; and the weighted residuals of the population mean (PWRES) and individual (IWRES) versus the corresponding predictions and time. The horizontal lines represent zero residual error.

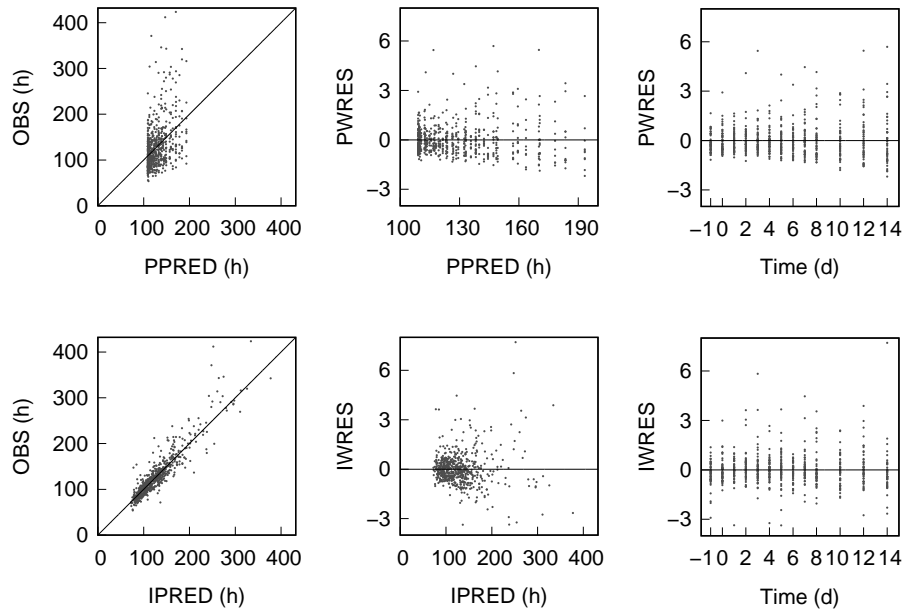

Figure S6: Goodness-of-fit plots for model-predicted and observed TTP data. The plots are: observed individual data (OBS) versus population predicted mean (PPRED) and individual predicted (IPRED) values, with the diagonal lines representing perfect fit; and the weighted residuals of the population mean (PWRES) and individual (IWRES) versus the corresponding predictions and time. The horizontal lines represent zero residual error.

Table S3: Goodness-of-fit summary statistics for Figures S4-S6.

| Parameter (units)                | Mean (SD)    | Median [2.5th, 97.5th] <sup>a</sup> |
|----------------------------------|--------------|-------------------------------------|
| <u>BDQ (n=1767)</u>              |              |                                     |
| OBS (mg/L)                       | 1500 (1320)  | 1110 [134, 4720]                    |
| IPRED (mg/L)                     | 1430 (1130)  | 1120 [151, 4220]                    |
| PPRED (mg/L)                     | 1480 (996)   | 1230 [202, 4110]                    |
| IWRES                            | 0.0 (1.0)    | -0.0285 [-1.74, 2.25]               |
| PWRES                            | 0.0 (1.0)    | -0.0374 [-1.91, 2.02]               |
| <u>CFU (n=681)</u>               |              |                                     |
| OBS (log <sub>10</sub> CFU/mL)   | 5.92 (1.05)  | 6.1 [3.22, 7.51]                    |
| IPRED (log <sub>10</sub> CFU/mL) | 5.96 (0.915) | 6.05 [3.74, 7.32]                   |
| PPRED (log <sub>10</sub> CFU/mL) | 5.85 (0.38)  | 5.95 [4.88, 6.21]                   |
| IWRES                            | 0.0 (1.0)    | 0.0099 [-1.98, 1.86]                |
| PWRES                            | 0.0 (1.0)    | 0.181 [-2.33, 1.49]                 |
| <u>TTP (n=619)</u>               |              |                                     |
| OBS (h)                          | 130 (51.1)   | 119 [72.5, 286]                     |
| IPRED (h)                        | 129 (44.4)   | 120 [79, 58]                        |
| PPRED (h)                        | 129 (21.5)   | 123 [109, 184]                      |
| IWRES                            | 0.0 (1.0)    | -0.0786 [-1.66, 2.46]               |
| PWRES                            | 0.0 (1.0)    | -0.205 [-1.32, 2.77]                |

n, sample size; OBS, observed; PPRED, population predicted; IPRED, individual predicted; PWRES population predicted weighted residual; IWRES, individual predicted weighted residual.

<sup>a</sup> Values in brackets are the 2.5th and 97.5th percentiles.
